# Supplementary material for: Body mass index and survival in people with heart failure
Source: PubMed Central journal article supplement (PMC10579501; doi:10.1136/heartjnl-2023-322459), 2023-06-08
Supplement: heartjnl-2023-322459supp001.pdf [file heartjnl-2023-322459supp001.pdf]

**Supplemental Table 1** Baseline characteristics of people with heart failure and available or missing BMI measurement.

| Variable                                               | With BMI<br>(n=47531) | Without BMI<br>(n=8428) |
|--------------------------------------------------------|-----------------------|-------------------------|
| <b>Gender, n (%)</b>                                   |                       |                         |
| Men                                                    | 25755 (54.19)         | 3479 (41.28)            |
| Women                                                  | 21776 (45.81)         | 4949 (58.72)            |
| <b>Age (years), median (IQR)</b>                       | 78 (70 - 84)          | 82 (74 - 88)            |
| <b>Age category, n (%)</b>                             |                       |                         |
| 45-54                                                  | 1664 (3.50)           | 274 (3.25)              |
| 55-64                                                  | 4809 (10.12)          | 617 (7.32)              |
| 65-74                                                  | 11189 (23.54)         | 1296 (15.38)            |
| 75-84                                                  | 18596 (39.12)         | 2938 (34.86)            |
| 85-94                                                  | 10574 (22.25)         | 2879 (34.16)            |
| 94+                                                    | 699 (1.47)            | 424 (5.03)              |
| <b>Ethnicity, n (%)</b>                                |                       |                         |
| White                                                  | 37537 (78.97)         | 6606 (78.38)            |
| Non-white                                              | 1348 (2.84)           | 149 (1.77)              |
| Mixed                                                  | 6078 (12.79)          | 507 (6.02)              |
| Missing                                                | 2568 (5.40)           | 1166 (13.83)            |
| <b>Smoking Status, n (%)</b>                           |                       |                         |
| Never                                                  | 18106 (38.09)         | 3146 (37.33)            |
| Former                                                 | 6152 (12.94)          | 942 (11.18)             |
| Current                                                | 22751 (47.87)         | 1756 (20.84)            |
| Missing                                                | 522 (1.10)            | 2584 (30.66)            |
| <b>Index of multiple deprivation (quintile), n (%)</b> |                       |                         |
| 1 (most deprived)                                      | 9244 (19.45)          | 1610 (19.10)            |
| 2                                                      | 10854 (22.84)         | 2100 (24.92)            |
| 3                                                      | 10177 (21.41)         | 1770 (21.00)            |
| 4                                                      | 10038 (21.12)         | 1669 (19.80)            |
| 5 (least deprived)                                     | 7175 (15.10)          | 1272 (15.09)            |
| Missing                                                | 43 (0.09)             | 7 (0.08)                |
| <b>Medical history of</b>                              |                       |                         |
| Atrial Fibrillation, n (%)                             | 12980 (27.31)         | 1649 (19.57)            |
| Angina, n (%)                                          | 10871 (22.87)         | 1094 (12.98)            |
| Diabetes, n (%)                                        | 12425 (26.14)         | 679 (8.06)              |
| Hypertension, n (%)                                    | 29052 (61.12)         | 3264 (38.73)            |
| Ischaemic Heart Disease, n (%)                         | 13196 (27.76)         | 1410 (16.73)            |
| Myocardial infarction, n (%)                           | 10271 (21.61)         | 1025 (12.16)            |
| Other Cardiovascular disease, n (%)                    | 12166 (25.60)         | 1591 (18.88)            |
| Stroke, n (%)                                          | 5432 (11.43)          | 839 (9.95)              |
| Valvular disease, n (%)                                | 3736 (7.86)           | 418 (4.96)              |
| <b>BMI (kg/m<sup>2</sup>)</b>                          | 27.06 (23.88 - 31)    | n/a                     |
| <b>Systolic blood pressure (mmHg)</b>                  | 137 (123 - 150)       | 140 (128 - 154)         |
| Missing                                                | 212 (0.45)            | 1060 (12.58)            |

|                                        |                 |                 |
|----------------------------------------|-----------------|-----------------|
| <b>Diastolic blood pressure (mmHg)</b> | 78 (70 - 83)    | 80 (70 - 85)    |
| Missing                                | 212 (0.45)      | 1060 (12.58)    |
| <b>Total cholesterol (mmol/L)</b>      | 4.5 (3.8 - 5.4) | 4.9 (4.1 - 5.8) |
| Missing                                | 10140 (21.33)   | 5338 (63.34)    |

**Abbreviations:** BMI: body mass index; IQR: interquartile range

**Supplemental Table 2** Age-adjusted survival rates at 1,5, 10, and 15 years after a diagnosis of heart failure stratified by BMI category.

| BMI category:     | Age-adjusted survival rate (% (95% CI)) |                        |                        |                       |
|-------------------|-----------------------------------------|------------------------|------------------------|-----------------------|
|                   | 1 year                                  | 5 years                | 10 years               | 15 years              |
| Underweight       | 67.26 (65.31 to 69.21)                  | 28.1 (25.52 to 30.68)  | 7.6 (6.16 to 9.04)     | 1.42 (0.92 to 1.91)   |
| Healthy weight    | 77.02 (76.48 to 77.55)                  | 43.35 (42.49 to 44.21) | 18.33 (17.51 to 19.15) | 6.06 (5.3 to 6.83)    |
| Overweight        | 80.88 (80.42 to 81.34)                  | 50.7 (49.91 to 51.49)  | 25.19 (24.3 to 26.07)  | 10.25 (9.21 to 11.29) |
| Obesity class I   | 81.43 (80.86 to 82.01)                  | 51.82 (50.74 to 52.9)  | 26.33 (25.15 to 27.51) | 11.03 (9.82 to 12.24) |
| Obesity class II  | 81.6 (80.7 to 82.51)                    | 52.17 (50.37 to 53.97) | 26.69 (24.77 to 28.6)  | 11.28 (9.66 to 12.9)  |
| Obesity class III | 78.07 (76.64 to 79.49)                  | 45.27 (42.66 to 47.89) | 20.02 (17.63 to 22.4)  | 7.01 (5.46 to 8.56)   |

**Abbreviations:** BMI: body mass index

**Supplemental Table 3** Survival rates at 1, 5, 10, and 15 years after a diagnosis of heart failure stratified by age and BMI category

| Subgroup          | Survival rate (% (95% CI)) |                        |                        |                        |
|-------------------|----------------------------|------------------------|------------------------|------------------------|
|                   | At 1 year                  | At 5 years             | At 10 years            | At 15 years            |
| 45-54 years       | 90.3 (88.97 to 91.65)      | 78.45 (76.36 to 80.6)  | 64.73 (61.61 to 68.01) | 54.44 (49.98 to 59.3)  |
| By BMI category:  |                            |                        |                        |                        |
| Underweight       | 87.84 (73.37 to 100)       | 60.39 (32.56 to 100)   | 40.26 (14.65 to 100)   | NA                     |
| Healthy weight    | 88.67 (85.2 to 92.28)      | 75.48 (70.23 to 81.11) | 61.43 (53.88 to 70.04) | 50.46 (40.53 to 62.82) |
| Overweight        | 91.53 (89.16 to 93.96)     | 82.41 (78.82 to 86.16) | 69.38 (63.56 to 75.73) | 57.22 (48.28 to 67.81) |
| Obesity class I   | 91.27 (88.46 to 94.17)     | 80.89 (76.49 to 85.53) | 68.99 (62.28 to 76.42) | 63.02 (54.44 to 72.95) |
| Obesity class II  | 90.9 (86.97 to 95.01)      | 76.34 (69.8 to 83.5)   | 61.99 (52.35 to 73.39) | 51.88 (39.79 to 67.65) |
| Obesity class III | 89.71 (85.42 to 94.21)     | 74.87 (67.48 to 83.08) | 57.47 (47.2 to 69.99)  | 57.47 (47.2 to 69.99)  |
| 55-64 years       | 87.88 (87 to 88.77)        | 70.63 (69.27 to 72.01) | 52.78 (50.93 to 54.7)  | 38.43 (35.56 to 41.53) |
| By BMI category:  |                            |                        |                        |                        |
| Underweight       | 69.84 (59.34 to 82.18)     | 47.77 (36.02 to 63.34) | 30.98 (18.34 to 52.32) | 30.98 (18.34 to 52.32) |
| Healthy weight    | 83.94 (81.64 to 86.3)      | 65.77 (62.54 to 69.16) | 49.72 (45.62 to 54.18) | 36.59 (30.74 to 43.55) |
| Overweight        | 88.82 (87.21 to 90.45)     | 74.97 (72.54 to 77.49) | 56.27 (52.71 to 60.07) | 42.09 (36.38 to 48.69) |
| Obesity class I   | 90.27 (88.54 to 92.03)     | 72.79 (69.89 to 75.8)  | 56.05 (52.12 to 60.29) | 45.62 (40.37 to 51.56) |
| Obesity class II  | 92.49 (90.38 to 94.65)     | 73.23 (69.21 to 77.47) | 51.09 (45.05 to 57.93) | 27.66 (17.74 to 43.14) |
| Obesity class III | 89.26 (86.59 to 92.01)     | 68.18 (63.64 to 73.05) | 49.56 (43.41 to 56.58) | 25.84 (17.1 to 39.06)  |
| 65-74 years       | 83.45 (82.79 to 84.12)     | 59.08 (58.12 to 60.06) | 35.38 (34.2 to 36.61)  | 17.23 (15.48 to 19.17) |
| By BMI category:  |                            |                        |                        |                        |
| Underweight       | 59.68 (52.53 to 67.8)      | 29.22 (22.18 to 38.51) | 21.74 (15.07 to 31.36) | 21.74 (15.07 to 31.36) |
| Healthy weight    | 78.11 (76.53 to 79.73)     | 53.29 (51.19 to 55.47) | 31.78 (29.33 to 34.43) | 15.37 (11.9 to 19.86)  |
| Overweight        | 85.79 (84.7 to 86.89)      | 61.49 (59.81 to 63.22) | 37.88 (35.8 to 40.09)  | 16.45 (13.34 to 20.28) |
| Obesity class I   | 86.58 (85.26 to 87.93)     | 62.81 (60.71 to 64.99) | 36.43 (33.67 to 39.41) | 17.89 (14.43 to 22.19) |
| Obesity class II  | 87.32 (85.38 to 89.31)     | 65.26 (62.15 to 68.52) | 38.79 (34.63 to 43.44) | 24.89 (18.71 to 33.12) |
| Obesity class III | 85.68 (82.98 to 88.47)     | 57.37 (52.93 to 62.2)  | 32.14 (26.31 to 39.25) | 13.39 (6.27 to 28.59)  |
| 75-84 years       | 76.54 (75.97 to 77.12)     | 43.2 (42.43 to 43.97)  | 18.37 (17.56 to 19.21) | 5.83 (4.85 to 7.01)    |
| By BMI category:  |                            |                        |                        |                        |
| Underweight       | 59.85 (55.21 to 64.88)     | 24.7 (20.24 to 30.15)  | 7.46 (4.06 to 13.68)   | NA                     |
| Healthy weight    | 73.04 (71.9 to 74.2)       | 38.81 (37.39 to 40.28) | 15.28 (13.91 to 16.78) | 4.8 (3.36 to 6.85)     |
| Overweight        | 79.61 (78.66 to 80.57)     | 46.9 (45.57 to 48.27)  | 20.7 (19.21 to 22.3)   | 7.3 (5.23 to 10.18)    |

|                   |                        |                        |                        |                      |
|-------------------|------------------------|------------------------|------------------------|----------------------|
| Obesity class I   | 81.68 (80.38 to 83)    | 48.42 (46.48 to 50.44) | 21.49 (19.26 to 23.98) | 6.91 (4.38 to 10.91) |
| Obesity class II  | 81.26 (78.97 to 83.62) | 51 (47.6 to 54.64)     | 24.32 (20.28 to 29.16) | 8.24 (3.84 to 17.68) |
| Obesity class III | 82.25 (78.64 to 86.02) | 45.25 (39.57 to 51.75) | 21.57 (15.33 to 30.34) | NA                   |
| 85-94 years       | 63.22 (62.38 to 64.06) | 22.26 (21.37 to 23.18) | 4.41 (3.76 to 5.18)    | 0.23 (0.04 to 1.38)  |
| By BMI category:  |                        |                        |                        |                      |
| Underweight       | 47.8 (42.89 to 53.27)  | 13.88 (9.97 to 19.32)  | NA                     | NA                   |
| Healthy weight    | 61.49 (60.06 to 62.97) | 20.56 (19.08 to 22.15) | 5.03 (3.87 to 6.53)    | 0.74 (0.15 to 3.77)  |
| Overweight        | 68.52 (67.02 to 70.04) | 25.45 (23.71 to 27.31) | 4.95 (3.65 to 6.7)     | NA                   |
| Obesity class I   | 69.03 (66.5 to 71.66)  | 30.48 (27.4 to 33.91)  | 6.29 (3.89 to 10.17)   | NA                   |
| Obesity class II  | 67.43 (61.97 to 73.37) | 28.8 (22.43 to 36.96)  | 6.56 (2.46 to 17.52)   | NA                   |
| Obesity class III | 73.33 (63.35 to 84.87) | 15.93 (7.22 to 35.14)  | NA                     | NA                   |
| 94+ years         | 43.9 (40.95 to 47.05)  | 6.03 (4.38 to 8.29)    | 43.9 (40.95 to 47.05)  | 6.03 (4.38 to 8.29)  |
| By BMI category:  |                        |                        |                        |                      |
| Underweight       | 32.29 (18.85 to 55.33) | NA                     | NA                     | NA                   |
| Healthy weight    | 45.56 (40.67 to 51.04) | 7.99 (4.95 to 12.91)   | NA                     | NA                   |
| Overweight        | 55.41 (48.59 to 63.19) | 7.52 (3.72 to 15.2)    | NA                     | NA                   |
| Obesity class I   | 47.76 (35.67 to 63.95) | 11.17 (3.78 to 33.06)  | NA                     | NA                   |
| Obesity class II  | 43.96 (23.28 to 83.01) | NA                     | NA                     | NA                   |
| Obesity class III | NA                     | NA                     | NA                     | NA                   |

**Abbreviations:** BMI: body mass index; N: not available (insufficient data for this analysis)

**Supplemental Table 4** Adjusted hazard Ratios (HR), 95% Confidence Intervals (CI) and the risk difference between BMI categories with all-cause mortality among people with heart failure.\*

| BMI Category               | Adjusted HR | Absolute Risk            | Risk Difference |
|----------------------------|-------------|--------------------------|-----------------|
| Healthy weight (reference) | 1.00        | 18.8% (8,959/14,880*100) | -               |
| Overweight                 | 0.78        | 18.8% * 0.78 = 14.7%     | -4.1%           |
| Obesity class I            | 0.76        | 18.8% * 0.76 = 14.3%     | -4.5%           |
| Obesity class II           | 0.76        | 18.8% * 0.76 = 14.3%     | -4.5%           |
| Obesity class III          | 0.96        | 18.8% * 0.96 = 18.1%     | -0.7%           |
| Underweight                | 1.59        | 18.8% * 1.59 = 30.0%     | 11.2%           |

Among participants with Heart Failure and healthy weight (n = 14,880), 18.8% (n = 8,959) died during follow-up. Risk differences calculated using the adjusted hazard ratios reported in Table 3.

\* Adjusted for age, smoking status, index of multiple deprivation, ethnicity, systolic and diastolic blood pressure, total cholesterol, and history of atrial fibrillation, angina, diabetes, hypertension, ischaemic heart disease, myocardial infarction, stroke, valvular heart disease, and other cardiovascular diseases.

**Supplemental Table 5** Hazard Ratios (HR) and 95% Confidence Intervals (CI) for the association of BMI categories with all-cause mortality among men and women with heart failure.\*

| BMI Category                                | Men  |      |                     | Women |      |                     | P-value interaction |
|---------------------------------------------|------|------|---------------------|-------|------|---------------------|---------------------|
|                                             | N    | n    | HR (95% CI)         | N     | n    | HR (95% CI)         |                     |
| Underweight (<18.5 kg/m <sup>2</sup> )      | 209  | 149  | 1.90 (1.61 to 2.24) | 472   | 297  | 1.48 (1.31 to 1.67) | 0.02                |
| Healthy weight (18.5-25 kg/m <sup>2</sup> ) | 5340 | 2998 | 1.00 (Reference)    | 4883  | 2581 | 1.00 (Reference)    | -                   |
| Overweight (25-30 kg/m <sup>2</sup> )       | 8255 | 3855 | 0.77 (0.73 to 0.81) | 4816  | 2199 | 0.79 (0.75 to 0.84) | 0.42                |
| Obesity class I (30-35 kg/m <sup>2</sup> )  | 4247 | 1789 | 0.76 (0.71 to 0.81) | 2988  | 1256 | 0.77 (0.72 to 0.83) | 0.57                |
| Obesity class II (35-40 kg/m <sup>2</sup> ) | 1490 | 569  | 0.77 (0.7 to 0.85)  | 1414  | 554  | 0.75 (0.68 to 0.82) | 0.72                |
| Obesity class III (≥40 kg/m <sup>2</sup> )  | 676  | 216  | 0.91 (0.79 to 1.05) | 938   | 378  | 0.97 (0.87 to 1.09) | 0.31                |

**Abbreviations:** N: number at risk of dying within the relevant BMI category; n: number dying from all-causes for the BMI category.

\* Adjusted for age, smoking status, index of multiple deprivation, ethnicity, systolic and diastolic blood pressure, total cholesterol, and history of atrial fibrillation, angina, diabetes, hypertension, ischaemic heart disease, myocardial infarction, stroke, valvular heart disease, and other cardiovascular diseases.

**Supplemental Table 6** Hazard Ratios (HR) and 95% Confidence Intervals (CI) for the association of BMI categories with all-cause mortality among people with heart failure and white, non-white or mixed ethnicity.

| Category          | White |      |                            | Non-white |     |                            |      | Mixed |             |                            | p*   |
|-------------------|-------|------|----------------------------|-----------|-----|----------------------------|------|-------|-------------|----------------------------|------|
|                   | N     | n    | HR (95% CI)                | N         | n   | HR (95% CI)                | N    | n     | HR (95% CI) |                            |      |
| Underweight       | 565   | 379  | <b>1.57 (1.41 to 1.75)</b> | 12        | 5   | 1.59 (0.64 to 3.95)        | 0.83 | 104   | 62          | <b>1.76 (1.35 to 2.29)</b> | 0.51 |
| Healthy weight    | 8416  | 4763 | 1.00 (Reference)           | 331       | 143 | 1.00 (Reference)           | -    | 1476  | 673         | 1.00 (Reference)           | -    |
| Overweight        | 10700 | 5211 | <b>0.78 (0.75 to 0.81)</b> | 429       | 170 | 0.89 (0.71 to 1.11)        | 0.32 | 1942  | 673         | <b>0.75 (0.67 to 0.83)</b> | 0.20 |
| Obesity class I   | 5799  | 2552 | <b>0.75 (0.72 to 0.79)</b> | 273       | 88  | <b>0.68 (0.51 to 0.89)</b> | 0.56 | 1163  | 405         | <b>0.87 (0.76 to 0.99)</b> | 0.56 |
| Obesity class II  | 2340  | 934  | <b>0.73 (0.67 to 0.78)</b> | 103       | 39  | 1.10 (0.76 to 1.59)        | 0.03 | 461   | 150         | 1.02 (0.85 to 1.23)        | 0.12 |
| Obesity class III | 1306  | 514  | 0.94 (0.85 to 1.03)        | 51        | 14  | 0.64 (0.36 to 1.14)        | 0.52 | 257   | 66          | 1.11 (0.86 to 1.45)        | 0.61 |

**Abbreviations:** BMI: body mass index; HR: hazard ratio; N: number at risk of dying from CVD within the relevant BMI category; n: number dying from CVD for the BMI category.

\* p-value for interaction



**Supplemental Table 7** Sensitivity analysis comparing different approaches to handling missing data in the primary analysis, in which we report the Hazard Ratios (HR) and 95% Confidence Intervals (CI) for the association of BMI categories with all-cause mortality among people with heart failure.

| Category                 | Adjusted HR (95% CI)                             |                                                      |                                                       |                                               |
|--------------------------|--------------------------------------------------|------------------------------------------------------|-------------------------------------------------------|-----------------------------------------------|
|                          | Complete case analysis (n = 35,728) <sup>a</sup> | Missing indicator analysis (n = 37,278) <sup>b</sup> | Excluding total cholesterol (n = 44,280) <sup>c</sup> | Multiple imputation (n = 47,531) <sup>d</sup> |
| <b>Underweight</b>       | <b>1.59 (1.45 to 1.75)</b>                       | <b>1.57 (1.43 to 1.73)</b>                           | <b>1.56 (1.44 to 1.68)</b>                            | <b>1.51 (1.40 to 1.63)</b>                    |
| <b>Healthy weight</b>    | 1.00 (Reference)                                 | 1.00 (Reference)                                     | 1.00 (Reference)                                      | 1.00 (Reference)                              |
| <b>Overweight</b>        | <b>0.78 (0.75 to 0.81)</b>                       | <b>0.79 (0.76 to 0.82)</b>                           | <b>0.80 (0.77 to 0.82)</b>                            | <b>0.79 (0.77 to 0.82)</b>                    |
| <b>Obesity class I</b>   | <b>0.76 (0.73 to 0.80)</b>                       | <b>0.77 (0.74 to 0.81)</b>                           | <b>0.77 (0.74 to 0.81)</b>                            | <b>0.77 (0.75 to 0.80)</b>                    |
| <b>Obesity class II</b>  | <b>0.76 (0.71 to 0.81)</b>                       | <b>0.77 (0.72 to 0.82)</b>                           | <b>0.77 (0.73 to 0.82)</b>                            | <b>0.76 (0.72 to 0.81)</b>                    |
| <b>Obesity class III</b> | 0.96 (0.88 to 1.05)                              | 0.97 (0.89 to 1.06)                                  | 0.96 (0.89 to 1.04)                                   | 0.95 (0.88 to 1.03)                           |

**Abbreviations:** n: number of participants included in analysis.

<sup>a</sup> Excluded those with missing information on ethnicity, smoking status, index of multiple deprivation, systolic and diastolic blood pressure, and total cholesterol.

<sup>b</sup> Excluded those with missing data on systolic and diastolic blood pressure, and total cholesterol, and added missing indicator variables for smoking, ethnicity, and index of multiple deprivation.

<sup>c</sup> Did not adjust for total cholesterol, all other covariates were kept the same. Those with missing data on ethnicity, smoking status, index of multiple deprivation, systolic and diastolic blood pressure were excluded.

<sup>d</sup> Adjusted for the same set of variables as in the complete case analyses. Results were pooled across 5 imputed datasets.

**Supplemental Table 8** Hazard ratios and 95% confidence intervals for the association of BMI categories with all-cause mortality among people with heart failure after excluding those dying within 1, 2, 3, 4, and 5 years after the assessment of BMI.\*

| Time between BMI assessment and death | Underweight (<18.5 kg/m <sup>2</sup> ) | Healthy weight (18.5-25 kg/m <sup>2</sup> ) | Overweight (25-30 kg/m <sup>2</sup> )    | Obesity class I (30-35 kg/m <sup>2</sup> ) | Obesity class II (35-40 kg/m <sup>2</sup> ) | Obesity class III (≥40 kg/m <sup>2</sup> ) |
|---------------------------------------|----------------------------------------|---------------------------------------------|------------------------------------------|--------------------------------------------|---------------------------------------------|--------------------------------------------|
| ≥ 1 year                              | 331/171,<br><b>1.38 (1.19 to 1.62)</b> | 6482/2986,<br>1.00 (Reference)              | 9403/3782,<br><b>0.82 (0.78 to 0.86)</b> | 5324/1981,<br><b>0.83 (0.78 to 0.88)</b>   | 2170/734,<br><b>0.82 (0.75 to 0.89)</b>     | 1188/392,<br>1.10 (0.98 to 1.23)           |
| ≥ 2 year                              | 223/112,<br><b>1.41 (1.16 to 1.71)</b> | 4771/2098,<br>1.00 (Reference)              | 7410/2887,<br><b>0.85 (0.81 to 0.90)</b> | 4189/1497,<br><b>0.85 (0.79 to 0.91)</b>   | 1741/580,<br><b>0.87 (0.79 to 0.96)</b>     | 916/292,<br><b>1.14 (1.00 to 1.30)</b>     |
| ≥ 3 year                              | 151/67,<br>1.27 (0.99 to 1.62)         | 3548/1510,<br>1.00 (Reference)              | 5739/2158,<br><b>0.86 (0.81 to 0.92)</b> | 3302/1161,<br><b>0.88 (0.81 to 0.95)</b>   | 1368/437,<br><b>0.87 (0.78 to 0.97)</b>     | 685/216,<br>1.14 (0.98 to 1.33)            |
| ≥ 4 year                              | 105/45,<br>1.27 (0.94 to 1.72)         | 2640/1086,<br>1.00 (Reference)              | 4439/1617,<br><b>0.88 (0.81 to 0.95)</b> | 2548/854,<br><b>0.88 (0.80 to 0.97)</b>    | 1084/339,<br>0.91 (0.80 to 1.03)            | 531/158,<br>1.12 (0.94 to 1.34)            |
| ≥ 5 year                              | 70/26,<br>1.09 (0.74 to 1.61)          | 1959/781,<br>1.00 (Reference)               | 3377/1186,<br><b>0.86 (0.79 to 0.95)</b> | 1982/644,<br>0.89 (0.80 to 1.00)           | 830/261,<br>0.93 (0.80 to 1.08)             | 407/113,<br>1.08 (0.88 to 1.33)            |

**Abbreviations:** BMI: body mass index

\* The numbers shown in each cell correspond to the number at risk, number dying, the hazard ratio and its confidence intervals within brackets.

**Supplemental Table 9** Numbers and causes of death of people with heart failure stratified by BMI category.

| <b>Causes of death subgroup, n (%)</b> | <b>Underweight<br/>(<math>&lt;18.5</math> kg/m<sup>2</sup>)</b> |        | <b>Healthy weight<br/>(18.5-25 kg/m<sup>2</sup>)</b> |        | <b>Overweight<br/>(25-30 kg/m<sup>2</sup>)</b> |        | <b>Obesity class I<br/>(30-35 kg/m<sup>2</sup>)</b> |        | <b>Obesity class II<br/>(35-40 kg/m<sup>2</sup>)</b> |        | <b>Obesity class III<br/>(<math>\geq 40</math> kg/m<sup>2</sup>)</b> |        |
|----------------------------------------|-----------------------------------------------------------------|--------|------------------------------------------------------|--------|------------------------------------------------|--------|-----------------------------------------------------|--------|------------------------------------------------------|--------|----------------------------------------------------------------------|--------|
| Total Number of Deaths                 | 756                                                             | (100)  | 8959                                                 | (100)  | 8939                                           | (100)  | 4197                                                | (100)  | 1417                                                 | (100)  | 745                                                                  | (100)  |
| Death due to cardiovascular disease    | 383                                                             | (50.7) | 4955                                                 | (55.3) | 5008                                           | (56.0) | 2338                                                | (55.7) | 826                                                  | (58.3) | 403                                                                  | (54.1) |
| Heart failure primary cause            | 63                                                              | (8.33) | 675                                                  | (7.53) | 533                                            | (5.96) | 278                                                 | (6.62) | 86                                                   | (6.07) | 65                                                                   | (8.72) |
| Heart failure any cause of death*      | 347                                                             | (45.9) | 3891                                                 | (43.4) | 3659                                           | (40.9) | 1774                                                | (42.3) | 623                                                  | (44.0) | 348                                                                  | (46.7) |
| Arrhythmias (ICD-10 codes: I47-        | 20                                                              | (2.65) | 162                                                  | (1.81) | 136                                            | (1.52) | 59                                                  | (1.41) | 24                                                   | (1.69) | 7                                                                    | (0.94) |
| Diseases of the respiratory system     | 196                                                             | (25.9) | 1526                                                 | (17.0) | 1334                                           | (14.9) | 573                                                 | (13.7) | 184                                                  | (13.0) | 111                                                                  | (14.9) |
| Cancer                                 | 59                                                              | (7.80) | 1061                                                 | (11.8) | 1243                                           | (13.9) | 615                                                 | (14.7) | 179                                                  | (12.6) | 72                                                                   | (9.66) |
| Diseases of the digestive system       | 32                                                              | (4.23) | 295                                                  | (3.29) | 333                                            | (3.73) | 138                                                 | (3.29) | 62                                                   | (4.38) | 33                                                                   | (4.43) |
| Diseases of the genitourinary          | 19                                                              | (2.51) | 197                                                  | (2.20) | 222                                            | (2.48) | 110                                                 | (2.62) | 40                                                   | (2.82) | 24                                                                   | (3.22) |
| Other                                  | 67                                                              | (8.86) | 925                                                  | (10.3) | 799                                            | (8.94) | 423                                                 | (10.1) | 126                                                  | (8.89) | 102                                                                  | (13.7) |

\* Includes patients for whom heart failure may have been the primary or a contributory cause of death.

**Supplemental Table 10** Hazard ratios and 95% confidence intervals for the association of BMI categories with CVD mortality among people with heart failure.

| <b>BMI Category</b>                         | <b>N</b> | <b>n</b> | <b>Crude model</b> |                | <b>Age &amp; Sex adjusted</b> |                | <b>N</b> | <b>n</b> | <b>Multivariable model</b> |                |
|---------------------------------------------|----------|----------|--------------------|----------------|-------------------------------|----------------|----------|----------|----------------------------|----------------|
| Underweight (<18.5 kg/m <sup>2</sup> )      | 1084     | 383      | 1.41               | (1.27 to 1.57) | 1.42                          | (1.28 to 1.57) | 681      | 236      | 1.51                       | (1.32 to 1.73) |
| Healthy weight (18.5-25 kg/m <sup>2</sup> ) | 14880    | 4955     | 1.00               | (Reference)    | 1.00                          | (Reference)    | 10223    | 3096     | 1.00                       | (Reference)    |
| Overweight (25-30 kg/m <sup>2</sup> )       | 17277    | 5008     | 0.76               | (0.73 to 0.79) | 0.82                          | (0.79 to 0.85) | 13071    | 3387     | 0.79                       | (0.75 to 0.83) |
| Obesity class I (30-35 kg/m <sup>2</sup> )  | 9013     | 2338     | 0.65               | (0.62 to 0.69) | 0.80                          | (0.76 to 0.84) | 7235     | 1681     | 0.77                       | (0.72 to 0.81) |
| Obesity class II (35-40 kg/m <sup>2</sup> ) | 3400     | 826      | 0.60               | (0.56 to 0.64) | 0.85                          | (0.78 to 0.91) | 2904     | 630      | 0.78                       | (0.71 to 0.85) |
| Obesity class III (≥40 kg/m <sup>2</sup> )  | 1877     | 403      | 0.55               | (0.50 to 0.61) | 0.97                          | (0.87 to 1.08) | 1614     | 329      | 0.97                       | (0.86 to 1.09) |

**Abbreviations:** BMI: body mass index; N: number at risk of dying from CVD within the relevant BMI category; n: number dying from CVD for the BMI category.

\* The numbers at risk and dying from CVD are smaller in the multivariable model due to missing data.

\*\* Adjusted for sex, age, smoking status, index of multiple deprivation, ethnicity, systolic and diastolic blood pressure, total cholesterol, and history of atrial fibrillation, angina, diabetes, hypertension, ischaemic heart disease, myocardial infarction, stroke, valvular heart disease, and other cardiovascular diseases.
